# Supplementary material
Source: PubMed Central journal article supplement (PMC7179623)
Supplement: AAC.02192-19-s0001.pdf [file AAC.02192-19-s0001.pdf]

**A**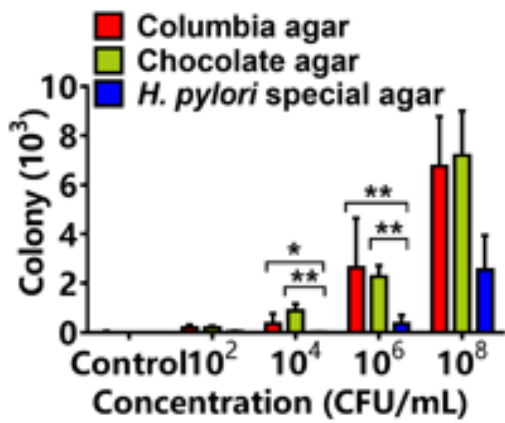**ATCC 43504**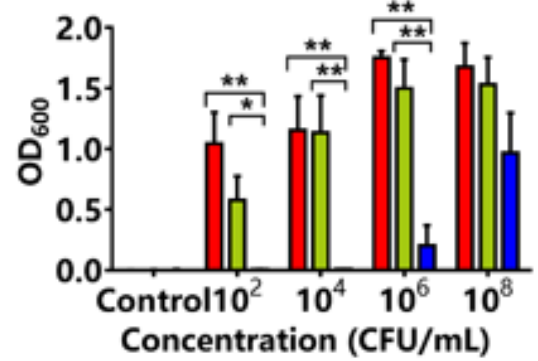**B**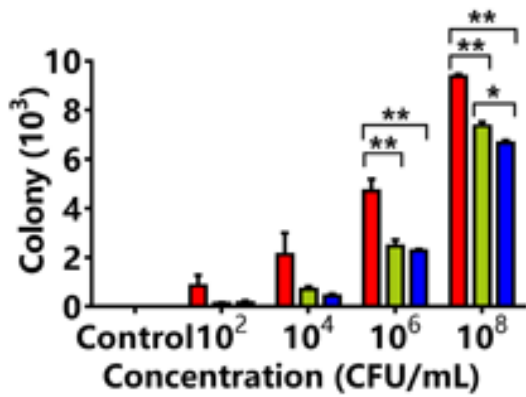**Wild type I**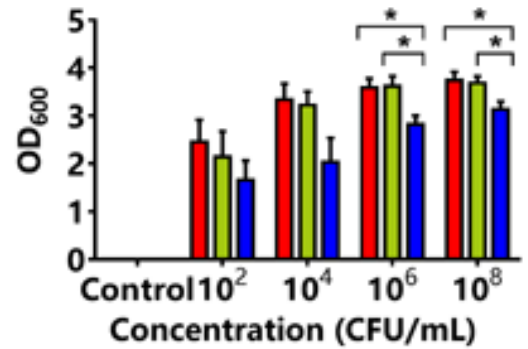**C**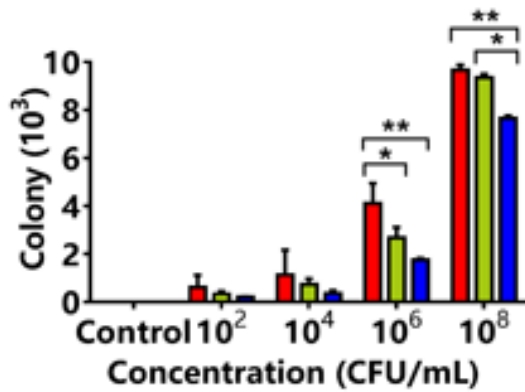**Wild type II**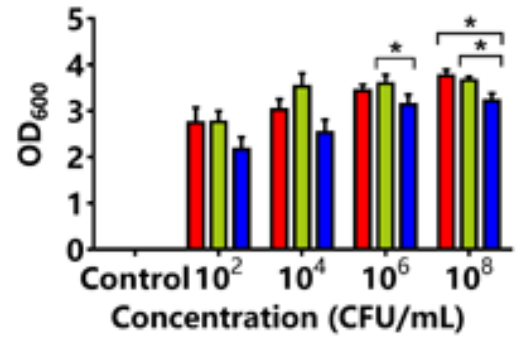**D**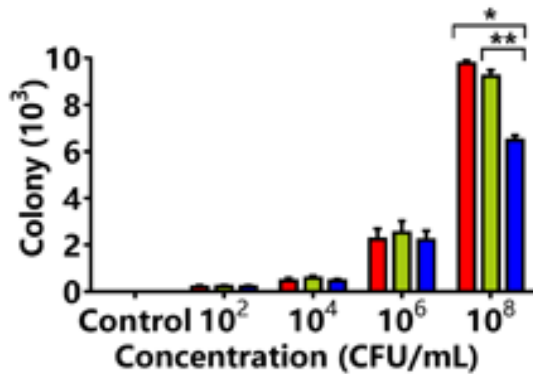**Wild type III**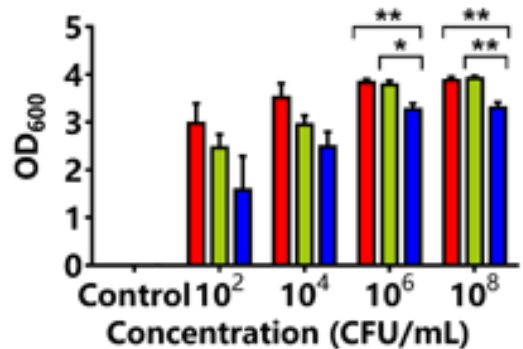

**Fig. S1. The growth of *H. pylori* strains (ATCC 43504 and 3 wild types) on Columbia blood agars, chocolate agars, and *H. pylori* special agars.** (A) The colony numbers and OD<sub>600</sub> of colony suspensions in *H. pylori* ATCC 43504 when the inoculum concentrations were  $1 \times 10^2$ ,  $10^4$ ,  $10^6$ , and  $10^8$  CFU/mL (n=6). (B) The colony numbers and OD<sub>600</sub> of colony suspensions in *H. pylori* wild type I (n=6). (C) *H. pylori* wild type II (n=6). (D) *H. pylori* wild type III (n=6). Saline solution was the control. Mean  $\pm$  SE, \* $P < 0.05$ , \*\* $P < 0.01$  vs control, one-way ANOVA and the Student's t-test.

**A**

ATCC 43504

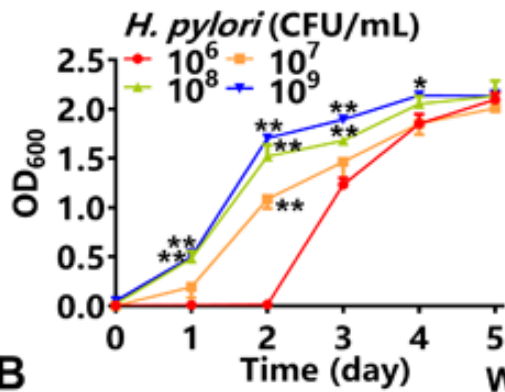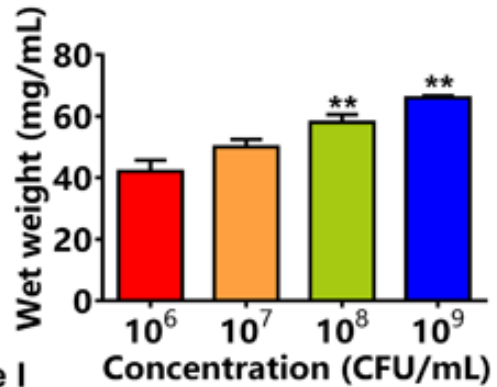**B**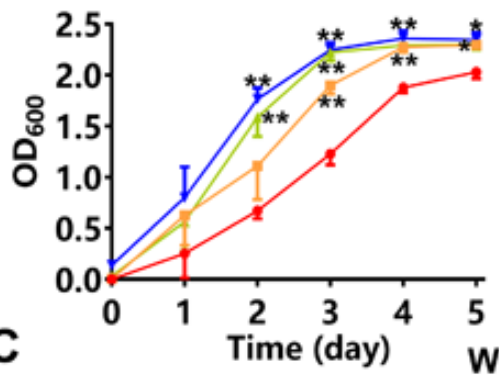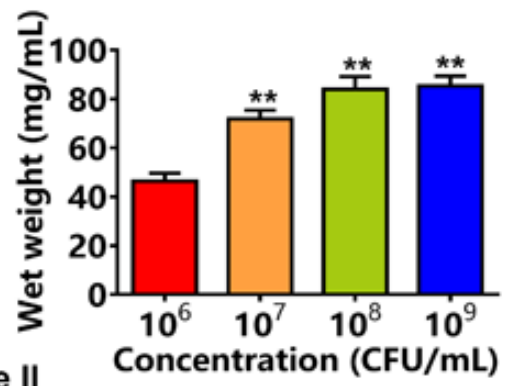**C**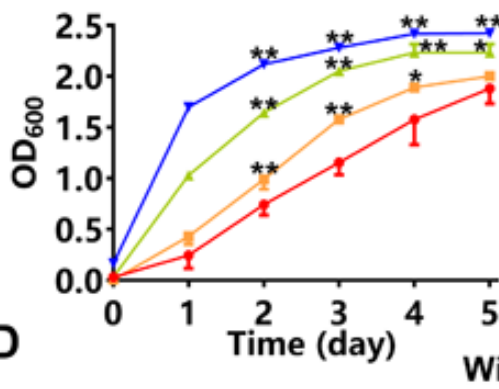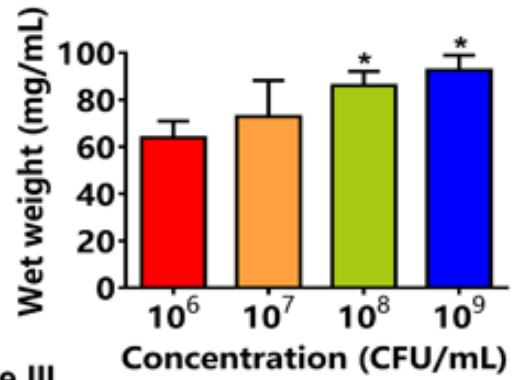**D**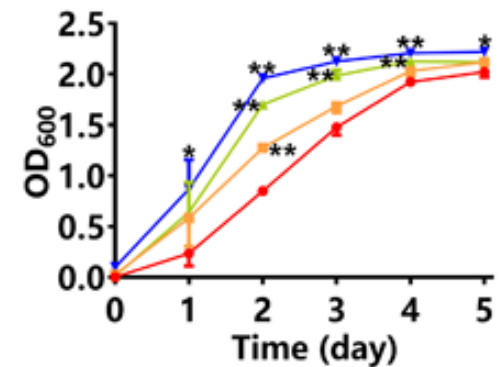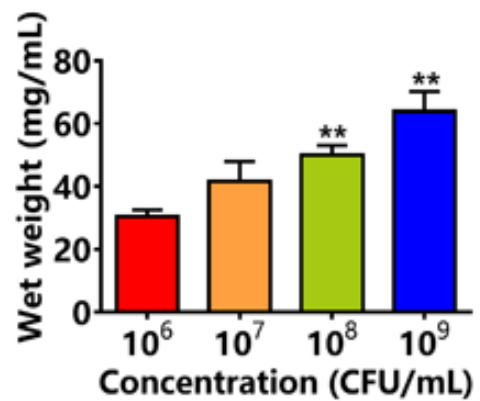

**Fig. S2. The growth of *H. pylori* strains (ATCC 43504 and 3 wild types) in special peptone broth.** (A) The OD<sub>600</sub> and wet weights of *H. pylori* ATCC 43504 when the inoculum concentrations were  $1 \times 10^6$ ,  $10^7$ ,  $10^8$ , and  $10^9$  CFU/mL (n=5). (B) The OD<sub>600</sub> and wet weights of *H. pylori* wild type I (n=5). (C) *H. pylori* wild type II (n=5). (D) *H. pylori* wild type III (n=5). Mean  $\pm$  SE, \* $P < 0.05$ , \*\* $P < 0.01$  vs  $10^6$  CFU/mL, one-way ANOVA and the Student's t-test.

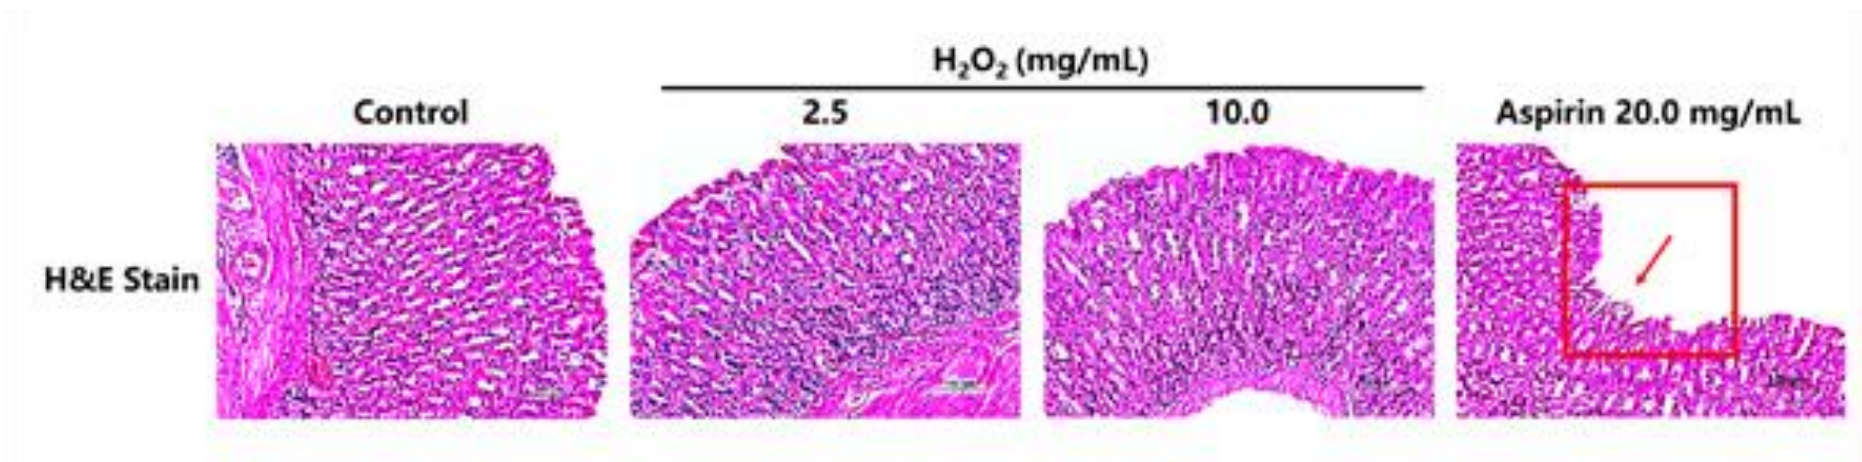

**Fig. S3.** The effect of hydrogen peroxide on gastric mucosa in Kunming mice. H&E stain. Aspirin 20.0 mg/mL was the positive control. The red arrow and the border showed the gastric ulcer.
